# 1 Model training periods impact estimation of COVID-19 incidence 2 from wastewater viral loads

3 Maria L. Daza-Torres<sup>1, +</sup>, J. Cricelio Montesinos-López<sup>1, +</sup>, Minji Kim<sup>2</sup>, Rachel Olson<sup>3</sup>, C.  
4 Winston Bess<sup>3</sup>, Lezlie Rueda<sup>2</sup>, Mirjana Susa<sup>1</sup>, Linnea Tucker<sup>3</sup>, Yury E. García<sup>1</sup>, Alec J.  
5 Schmidt<sup>1</sup>, Colleen Naughton<sup>4</sup>, Brad H. Pollock<sup>1</sup>, Karen Shapiro<sup>2</sup>, Miriam Nuño<sup>1</sup>, and Heather  
6 N. Bischel<sup>3,\*</sup>

7 <sup>1</sup> *Department of Public Health Sciences, University of California Davis, California 95616, United States*

8 <sup>2</sup> *Department of Pathology, Microbiology and Immunology, School of Veterinary Medicine, University of California Davis,  
9 Davis, California 95616, United States*

10 <sup>3</sup> *Department of Civil and Environmental Engineering, University of California Davis, Davis, California 95616, United States*

11 <sup>4</sup> *Department of Civil and Environmental Engineering, University of California Merced, Merced, California 95343, United  
12 States*

13 <sup>+</sup> *co-first author*

14 <sup>\*</sup> *corresponding author: hbischel@ucdavis.edu*

15 **Background:** Wastewater-based epidemiology (WBE) has been deployed broadly as an early warn-  
16 ing tool for emerging COVID-19 outbreaks. WBE can inform targeted interventions and identify  
17 communities with high transmission, enabling quick and effective response. As wastewater becomes  
18 an increasingly important indicator for COVID-19 transmission, more robust methods and metrics  
19 are needed to guide public health decision making.

20 **Objectives:** The aim of this research was to develop and implement a mathematical framework  
21 to infer incident cases of COVID-19 from SARS-CoV-2 levels measured in wastewater. We propose  
22 a classification scheme to assess the adequacy of model training periods based on clinical testing  
23 rates and assess the sensitivity of model predictions to training periods.

24 **Methods:** We present a Bayesian deconvolution method and linear regression to estimate COVID-  
25 19 cases from wastewater data. We described an approach to characterize adequacy in testing during  
26 specific time periods and provided evidence to highlight the importance of model training periods on  
27 the projection of cases. We estimated the effective reproductive number ( $R_e$ ) directly from observed  
28 cases and from the reconstructed incidence of cases from wastewater. The proposed modeling  
29 framework was applied to three Northern California communities served by distinct wastewater  
30 treatment plants.

31 **Results:** Both deconvolution and linear regression models consistently projected robust estimates  
32 of prevalent cases and  $R_e$  from wastewater influent samples when assuming training periods with  
33 adequate testing. Case estimates from models that used poorer-quality training periods consistently  
34 underestimated observed cases.

35 **Discussion:** Wastewater surveillance data requires robust statistical modeling methods to provide  
36 actionable insight for public health decision-making. We propose and validate a modeling framework  
37 that can provide estimates of COVID-19 cases and  $R_e$  from wastewater data that can be used as  
38 tool for disease surveillance including quality assessment for potential training data.

## 39 1 Introduction

40 During the early phases of the COVID-19 pandemic, caused by the severe acute respiratory syn-  
41 drome coronavirus 2 (SARS-CoV-2), the World Health Organization (WHO) recommended imple-  
42 menting mass testing programs as a containment measure. Individual diagnostic testing informs  
43 contact tracing and medical interventions, ideally cutting chains of transmission short and contain-  
44 ing outbreaks. Mass clinical screening programs can also provide valuable data on community-level  
45 health trends, but maintaining mass testing programs for the purpose of community-level monitor-  
46 ing is expensive and requires robust infrastructure with consistent availability of testing supplies  
47 and human resources.<sup>1</sup> Moreover, diagnostic tests validated in low-throughput clinical settings (like  
48 nucleic acid amplification tests or NAATs) are not necessarily efficient platforms for constructing  
49 community screening programs.<sup>2</sup> Design-wise, employing such tests for large-scale screening requires  
50 extensive logistical coordination over large geographic areas. This becomes especially complicated  
51 when the options for diagnostic tests are myriad, lack standardization, and depend heavily on local  
52 social landscapes. Small biases in the tests may be inflated when deployed broadly, leading to large  
53 spurious associations at the population level.<sup>3,4</sup>

54 Public health authorities are turning to wastewater-based epidemiology (WBE) as an alternative  
55 strategy for unbiased population-level surveillance of COVID-19. WBE uses biomarkers in wastew-  
56 ater to monitor trends in community-level health indices. WBE methods have been used to detect  
57 changes in drug consumption,<sup>5,6</sup> dietary patterns,<sup>7</sup> and the circulation of pathogens like poliovirus  
58 and norovirus.<sup>8</sup> Measurements of SARS-CoV-2 RNA in wastewater correlate strongly with changes  
59 in COVID-19 prevalence in the associated communities.<sup>9-12</sup> Since the onset of the pandemic, WBE  
60 of SARS-CoV-2 has been implemented in over 67 countries and 279 universities.<sup>13</sup> In some places,  
61 WBE programs have detected changes in SARS-CoV-2 RNA levels in wastewater prior to changes in  
62 local COVID-19 hospitalization activity and spikes in NAAT screening cases.<sup>14-19</sup> Others have used  
63 WBE to assess the effectiveness of public health interventions,<sup>20</sup> and recently, WBE was used to  
64 predict hospitalizations and ICU admissions.<sup>21</sup> In addition to monitoring trends, WBE can provide  
65 estimates of critical disease transmission parameters in the community without the biases associated  
66 with test-seeking behavior or poor access to testing programs.

67 An ongoing challenge for WBE is developing robust data collection and interpretation methods  
68 that are comparable across time and geography. Variation in sampling design and sample pro-  
69 cessing methods, natural variability in viral shedding rates in feces, variability in wastewater flow  
70 volume, population fluctuations, and location-specific characteristics of wastewater management  
71 are all factors that make inference of new COVID-19 cases from wastewater data challenging.<sup>22-25</sup>  
72 Such factors will ultimately affect uncertainty estimates when modeling disease incidence and other  
73 public health indicators. An ideal WBE program would implement a generalized approach that pro-  
74 vides consistent estimates of disease burden in a targeted population, yielding public health metrics  
75 like the disease incidence, disease prevalence and/or the effective reproductive number ( $R_e$ ). Previ-  
76 ous studies that approach this problem include: simple algebraic adjustments with environmental  
77 constants<sup>26</sup>; estimating the total number of cases with a susceptible-exposed-infectious-recovered  
78 (SEIR) model informed by wastewater results<sup>11</sup>; using regression analysis to estimate the number  
79 of infected people<sup>9</sup>; and making near real-time estimates of  $R_e$ .<sup>10,27</sup>

80 We propose and compare two modeling approaches: a simple linear model and a Bayesian  
81 deconvolution approach to estimate COVID-19 incident cases from wastewater viral loads. Both  
82 models rely on short training periods to calibrate wastewater measurements using clinical testing  
83 data from a community screening program. We evaluate the impact of different training periods  
84 on model predictions, hypothesizing that relative rates of change in clinical testing and reported  
85 cases can be used to identify appropriate model training periods. We then apply the framework to

86 estimate incident cases and  $R_e$  from wastewater influent data generated for three communities in  
87 Northern California. The methodology we describe can be generalized to other WBE systems to  
88 track the evolution and assess the magnitude of COVID-19 fluctuations and outbreaks in a manner  
89 that is comparable across programs, locations, and time.

## 90 2 Methods

91 The analytical framework was developed using data from the City of Davis (Davis) and replicated for  
92 the City of Woodland and the University of California Davis. Analysis includes case and wastewater  
93 (WW) data from December 1, 2021 to March 31, 2022. Results for the City of Woodland and UC  
94 Davis are presented in the Supplementary Materials section.

### 95 2.1 Wastewater sample collection

96 Staff from three Northern California wastewater treatment facilities (Davis, Woodland, and UC  
97 Davis) provided 24-hour composite wastewater samples 5-7 days per week. Samples were acquired  
98 using Teledyne ISCO 5800 refrigerated autosamplers in Davis and Woodland and a Hach Sigma  
99 900 autosampler for UC Davis. The autosampler in Davis was programmed to collect 400 mL of  
100 influent every 15 “pulses”, where one pulse was set at 10,000 gallons. An average of 24 pulses was  
101 expected per day based on an average daily influent flow of 3.6 million gallons per day (MGD).  
102 The autosampler in Woodland was programmed to acquire 100 mL of influent every 15 min over a  
103 24-hours period. The autosampler for UC Davis was programmed to acquire approximately 200 mL  
104 of influent every 20 min over a 24-hours period. The reported sample collection date corresponds  
105 to the date when an autosampler program was completed. Davis and UC Davis provided 12 ml  
106 samples in new 15-ml polypropylene centrifuge tubes. Woodland provided 1 L samples in Nalgene  
107 bottles that were washed, sterilized, and reused over the duration of sampling. Samples were stored  
108 at 4°C and transported weekly in coolers on ice to the analytical lab at UC Davis. For biosafety  
109 compliance, samples were placed in a water bath set at 60°C for 30 minutes and returned to 4°C  
110 prior to sample processing. Concentration and extraction were performed in a biosafety level 2  
111 (BSL2)-certified laboratory.

### 112 2.2 Sample concentration and extraction

113 The sample concentration and extraction protocol were adapted from Karthikeyan et al.<sup>28</sup> using  
114 4.875 mL instead of 10 mL starting sample volume. Each wastewater sample was deposited into  
115 a separate well of a KingFisher 24 deep-well plate (Thermo Fisher). An extraction control blank  
116 (nuclease-free water) was included in 90% of the deep-well plates to assess potential contamination  
117 during concentration and extraction. Each well was spiked with 50  $\mu\text{L}$  of Nanotrap<sup>®</sup> Enhancement  
118 Reagent 1 (Ceres Nanosciences product ER1 SKU # 10111-10, 10111-30) and 5  $\mu\text{L}$  of a stock of  
119 vaccine-strain Bovine Coronavirus (BCoV, Bovilis<sup>®</sup> Coronavirus vaccine) containing an estimated  
120  $1.3 \times 10^8$  gc/mL as measured by ddPCR. 500  $\mu\text{L}$  aliquots of the initial BCoV vaccine stock, prepared  
121 from the suspension of lyophilized BCoV vaccine in 20 mL buffer provided with the kit, were  
122 stored at  $-80^\circ\text{C}$  prior to use. Each spiked sample was manually agitated by pipetting up and  
123 down at least three times using a 5 mL pipette. Samples were then incubated for 30 minutes at  
124 room temperature. Following incubation, concentration was carried out using 75  $\mu\text{L}$  Nanotrap<sup>®</sup>  
125 Magnetic Virus Particles (Ceres Nanosciences) on a KingFisher Apex robot (Thermo Scientific).  
126 Concentrated viruses were eluted from the Nanotrap<sup>®</sup> beads into 400 mL of lysis buffer per sample  
127 from the MagMAX Microbiome Ultra Nucleic Acid Isolation Kit (Thermo Fisher). Concentrated

128 samples were extracted per the MagMAX kit manufacturer instructions in 96 deep-well plates on  
129 the KingFisher Apex. Samples were eluted in 100  $\mu\text{L}$  of MagMAX Elution Solution. Extracts were  
130 typically stored on ice and immediately subjected to same-day analysis. When same-day analysis  
131 was not possible, extracts were immediately stored at  $-80^{\circ}\text{C}$  until analysis.

### 132 **2.3 Extract analysis by ddPCR**

133 Sample extracts were analyzed by digital droplet polymerase chain reaction (ddPCR) for four tar-  
134 gets: N1 and N2 targeting regions of the nucleocapsid (N) gene of SARS-CoV-2, and Bovine Coro-  
135 navirus (BCoV) and pepper mild mottle virus (PMMoV) for normalization of the SARS-CoV-2  
136 results. N1/N2 and BCoV/PMMoV were quantified in separate duplex assays. Due to high levels  
137 of PMMoV, the sample for the PMMoV/BCoV duplex was diluted 40x prior to loading. The duplex  
138 ddPCR amplifications were performed in 20  $\mu\text{L}$  reactions on a QX ONE ddPCR System (Bio-Rad).  
139 Each reaction contained the following components: 1x Supermix, 20  $U/\mu\text{L}$  Reverse transcriptase,  
140 15 mM Dithiothreitol from the One-Step RT-ddPCR Advanced Kit for Probe (Bio-Rad), 900 nM  
141 of each primer, 250 nM of each probe, and 5  $\mu\text{L}$  of sample extract or control. The one-step ddPCR  
142 reaction consisted of 3 min plate equilibrium at  $25^{\circ}\text{C}$ , 60 min reverse transcription at  $50^{\circ}\text{C}$ , 10  
143 min enzyme activation at  $95^{\circ}\text{C}$ , followed by 40 cycles of 30 s denaturation at  $94^{\circ}\text{C}$  and 1 min  
144 annealing/extension at  $58^{\circ}\text{C}$ , and then 10 min enzyme deactivation at  $98^{\circ}\text{C}$  and 1 min droplet  
145 stabilization at  $25^{\circ}\text{C}$ . Preparation and plating of ddPCR master mix were carried out in a sep-  
146 arate location from sample loading to avoid contamination. Sample loading was performed using  
147 an epMotion<sup>®</sup> 5075 (Eppendorf) liquid handler. Each ddPCR plate included duplicate positive  
148 controls (stock mixture of synthesized gene fragments containing for the four target regions) for  
149 each target and duplicated no-template controls (nuclease free water). Additional information on  
150 the ddPCR assay designs is available in [Tables S1–S4](#). [Table S1](#) summarizes primers, probes for  
151 ddPCR assays performed as part of this work. [Table S2](#) and [S3](#) provide the ddPCR reaction and  
152 20X primer/probe mix recipes. From October 21 to December 21, Cy5 and Cy5.5 were used in place  
153 of FAM and HEX as the fluorophores for PMMoV and BCoV, respectively. [Table S4](#) lists details  
154 for the positive controls. Prior to 12/21/22 the annealing temperature was  $60^{\circ}\text{C}$ . The selection of  
155 positive and negative droplet clusters in samples and controls was conducted manually based on  
156 visual inspection of clusters. Results were considered invalid if the distribution of positive or nega-  
157 tive droplets appeared abnormal in shape or if the total number of droplets generated fell below a  
158 threshold of 10,000 droplets in a single well. Additional information on data processing and quality  
159 control is provided in the Supplemental Material. We utilize  $N/\text{PMMoV}$  (the average SARS-CoV-2  
160 RNA concentration (N) divided by the concentration of PMMoV) as the resulting WW signal for  
161 subsequent model development.

### 162 **2.4 COVID-19 case data**

163 Healthy Davis Together (HDT) and Healthy Yolo Together (HYT) provided daily COVID-19 cases  
164 and total tests performed during the study period for the City of Davis, UC Davis, and Wood-  
165 land, from the community screening program.<sup>29,30</sup>

166 Data were smoothed for the implementation of the linear model using a 7-day moving average  
167 (the mean of the current and the previous six days). This approach improves harmonization between  
168 the current WW concentration and observed cases ([Figure 1B](#)). The 7-day moving average of cases  
169 for the linear model is similar to a deconvolution model with equal weights (uniform shedding load  
170 distribution) and a shedding time of 7 days ([Section 2.6.1](#)). Rate of change for tests administered  
171 and positive cases were calculated from a weekly aggregation of daily test counts and positive

172 cases identified. Changes in test and case rates were then used to determine training periods with  
 173 adequate testing.

## 174 2.5 Smoothed wastewater signal

175 To reduce uncertainty and to minimize daily fluctuations of cases observed, we applied a 10-day  
 176 moving average for daily influent WW data (Figure 1A). We use the resulting smoothed influent  
 WW data to correlate with smoothed cases (Figure 1B).

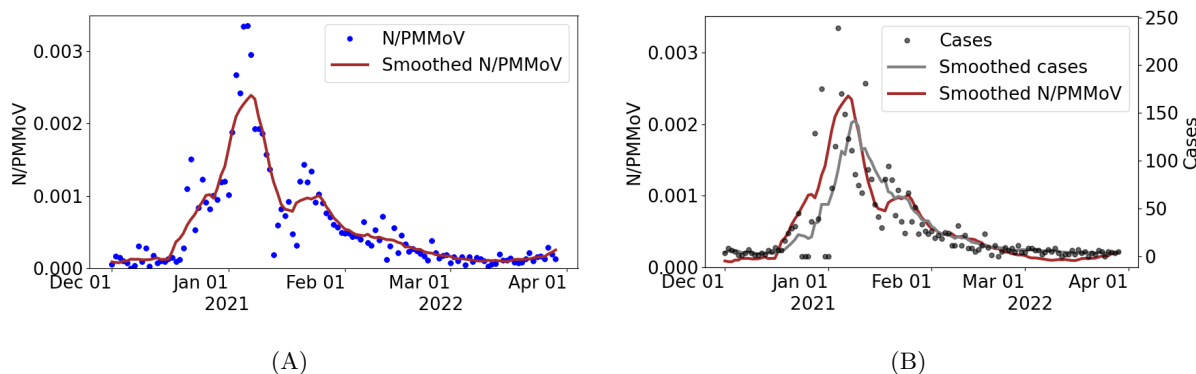

Figure 1: (A) Wastewater data (N/PMMoV) and 10-day moving average (Smoothed N/PMMoV) from December 1, 2021 to March 31, 2022. (B) Cases, 7-day moving average smoothed cases, and 10-day moving average of smoothed WW data.

177

## 178 2.6 Models

179 We present two models to estimate COVID-19 cases from SARS-CoV-2 RNA in the WW. The  
 180 first model was adapted from Huisman et al.'s approach<sup>10</sup> and relates past infections with WW  
 181 signal through the convolution described in Equation (3). The number of daily cases is modeled  
 182 with a negative binomial (NB) distribution through the deconvolution (the inverse operation of  
 183 convolution) noted in Equation (3). The second approach uses a simple linear regression to estimate  
 184 cases (dependent variable) from WW data (independent variable). We also propose a strategy for  
 185 selecting model training periods with adequate clinical testing to estimate parameters and improve  
 186 estimation.

### 187 2.6.1 Deconvolution model

188 Viral RNA concentrations measured in wastewater ( $C_i$ 's) are related to the number of new infections  
 189 per day ( $I_i$ 's) through the profile of SARS-CoV-2 RNA shedding in the wastewater by an infected  
 190 individual days after infection or symptom onset.<sup>10</sup> The measurement  $C_i$  of WW on day  $i$  is related  
 191 to infections  $I_j$  on prior day  $j$  through the following convolution:

$$C_i = N \cdot M \sum_{j=0}^{m-1} w_j I_{i-j}, \quad i = 1, \dots, n, \quad (1)$$

192 where  $w_j$ ,  $j = 1, \dots, m$  (sums to 1) is the shedding load distribution describing the temporal  
 193 dynamics of shedding and  $m$  is the duration of viral shedding or shedding time. The normalization

194 factor  $N$  represents the total virus shed by an infected individual during the infection period.  $M$  is  
195 a constant that depends on the sewer system, wastewater treatment plant, and processing pipeline.

196 The measurement of viral RNA in wastewater  $C_i$  on the day  $i$  is used to estimate COVID-19 cases  
197 from wastewater concentration data via convolution. As noted by Huisman et al.,<sup>10</sup> normalization  
198 factors  $N$  and  $M$  are difficult to measure, and they assume  $B = N \cdot M$  as the lowest concentration of  
199 the viral load or concentration from a single infection.<sup>10</sup> The weights for shedding load distribution  
200 ( $w_j$ ) can be estimated using individual-pooled analysis of SARS-CoV-2 viral loads.<sup>31–33</sup> Instead, we  
201 estimate  $B$  and corresponding weights using measured WW data and cases within a specified period  
202 (training period) by directly modeling the deconvolution process through a Bayesian approach.

We model  $w_j$  as follows:

$$w_j = \frac{f_b(j)}{\sum_{k=0}^{m-1} f_b(k)}, \quad j = 0, 1, \dots, m-1,$$

203 where  $f_b(k)$  is the probability density function (pdf) of a random variable  $X$  with exponential  
204 distribution of rate parameter  $b$ . Hereafter, notation  $w_j^b$  will be used instead of  $w_j$  emphasizing that  
205 weights depends on parameter  $b$ . Notice that, if  $X \sim \text{Exp}(b)$  then its pdf is  $f_b(k) = be^{-b \cdot k}$ , thus:

$$w_j^b = \frac{be^{-b \cdot k}}{\sum_{k=0}^{m-1} be^{-b \cdot k}} = \frac{e^{-b \cdot k}}{\sum_{k=0}^{m-1} e^{-b \cdot k}}, \quad j = 0, 1, \dots, m-1. \quad (2)$$

206 Equation (1) is rewritten using Equation (2) as follows:

$$C_i = B \sum_{j=0}^{m-1} w_j^b \times I_{i-j}. \quad (3)$$

207 The deconvolution of the Equation (3) will be denoted as  $\text{dec}(\mathbf{C}, B, b)$ , where  $\mathbf{C} = (C_1, C_2, \dots, C_n)$   
208 represents the vector of WW data and parameters  $B$  and  $b$  are described above.  $\mathbf{I} = (I_1, I_2, \dots, I_n)$   
209 correspond to daily cases counts and its theoretical expectation is given by  $(\mathbb{E}(\mathbf{I}) = \boldsymbol{\mu})$  estimated  
210 in terms of the deconvolution model as  $\boldsymbol{\mu} = (\mu_1, \mu_2, \dots, \mu_n) = \text{dec}(\mathbf{C}, B, b)$ . The deconvolution is  
211 approximated using the Richardson–Lucy algorithm.<sup>34</sup>

212

## 213 Observational model

214 We estimate the number of COVID-19 cases per day ( $I_i$ 's) using the Negative Binomial (NB) model,  
215 which is most relevant for overdispersed count data. In this situation, the variance exceeds the mean.  
216 The NB distribution describes a sequence of independent and identically distributed Bernoulli trials  
217 with a probability of success  $p$  before a specified (non-random) number of successes ( $r$ ) occurs.  
218 Assuming a similar approach as in Lindén et al.,<sup>35</sup> we reparametrized the NB distribution in terms  
219 of its mean  $\mu$  and “overdispersion” parameters  $\omega$  and  $\alpha$ , with  $r = \frac{\mu}{\omega - 1 + \alpha\mu}$  and  $p = \frac{1}{\omega + \alpha\mu}$  in the usual  
220 NB parametrization. We assume that  $I_i$  follows a NB distribution. Denoting the mean and variance  
221 as  $\mu_i$  and  $\sigma_i^2$ , respectively, and requiring that  $\sigma_i^2 = \omega\mu_i + \alpha\mu_i^2 > \mu_i$ , we enforce overdispersion for  
222 suitable chosen parameters  $\omega$  and  $\alpha$ . The index of dispersion is  $\frac{\sigma_i^2}{\mu_i} = \omega + \alpha\mu_i$ . Overdispersion  
223 concerning the Poisson distribution is achieved when  $\omega > 1$  and the index of dispersion increases  
224 with size if  $\alpha \neq 0$ ; adding variability as counts increase. We found good performance fixing  $\omega = 2$   
225 and  $\alpha = 0.05$ , implying higher variability for the later.

Using the deconvolution model and parameter as described above, we obtain the following likelihood function with the assumed NB model:

$$L(\theta|\mathbf{C}, \mathbf{I}) = \prod_{i=1}^n \binom{I_i + r_i - 1}{r_i - 1} p_i^{r_i} (1 - p_i)^{I_i},$$

where  $r_i = \frac{\mu_i}{\omega - 1 + \alpha \mu_i}$  is the number of successes,  $p_i = \frac{1}{\omega + \alpha \mu_i}$  is the probability of a single success, and  $(\mu_1, \mu_2, \dots, \mu_n) = \text{dec}(\mathbf{C}, B, b)$ .

We estimate  $\theta = (B, b)$  from measurements of WW data  $\mathbf{C} = (C_1, C_2, \dots, C_n)$  and COVID-19 cases  $\mathbf{I} = (I_1, I_2, \dots, I_n)$ . We adopt a Bayesian statistical approach, which is well suited to model multiple sources of uncertainty and allows the incorporation of background knowledge on the model's parameters. In this framework, a prior distribution,  $\pi_{\Theta}(\theta)$ , is required to account for unknown parameter  $\theta$  in order to obtain the posterior distribution. For  $b$ , we assumed a Gamma distribution with shape and scale parameters  $v_b = 2$  and  $S_b = 1$ , respectively; this assumption is based on published data on viral shedding duration in gastrointestinal samples.<sup>36</sup> For  $B$ , we assumed a Gamma distribution with shape and scale parameters  $v_M = 2$  and  $S_M = 2/1e^{-4}$ , respectively; based on the lowest viral RNA concentrations observed. Having specified the likelihood and the prior, we use Bayes' rule to calculate the posterior distribution,

$$\pi_{\Theta|\mathbf{C}, \mathbf{I}}(\theta|\mathbf{C}, \mathbf{I}) = \frac{\pi_{\Theta}(\theta)L(\theta|\mathbf{C}, \mathbf{I})}{Z(\mathbf{I})},$$

where  $Z(\mathbf{I}) = \int \pi_{\Theta}(\theta)L(\theta|\mathbf{C}, \mathbf{I})d\theta$  is the normalization constant. The posterior distribution is simulated using a t-walk Markov chain Monte Carlo (MCMC) algorithm.<sup>37</sup>

## Duration of viral shedding

The deviance information criterion (DIC) was used to select the shedding time ( $m$ ). DIC is a Bayesian generalization of the Akaike information criterion (AIC) for model selection in a finite set of models, with preference given to models with lower DIC. The DIC is preferred in settings with Bayesian model selection problems where the model's posterior distributions are obtained by MCMC simulation.<sup>38</sup> We selected the appropriate shedding time by computing DIC in a grid search along the parameter space  $m : \{6, \dots, 10\}$ .

### 2.6.2 Simple linear regression model

We assume the following noise model,

$$\log(I_i) = \beta \log(C_i) + \epsilon_i, \quad i = 1, \dots, n \quad (4)$$

where  $I_i$  is the number of new infections on day  $i$ ,  $C_i$  is the measurement of viral RNA in the wastewater on the  $i$ th day, and  $\epsilon_i$  is a random residual associated with day  $i$  which is assumed to be distributed as  $N(0, \sigma^2)$ , with  $\sigma^2$  as the residual variance. This inference problem aims to estimate  $\theta = (\beta, \sigma)$  from WW data and cases. A log-linear model is assumed to address positively skewed data and prevent negative fitted values.

## 2.7 Selection of model training periods

We describe whether or not testing is adequate in a particular period of observed cases by calculating the rate of change in tests conducted and new cases within a specific time period. We define the

247 rate of change of both tests conducted ( $r_i^T$ ) and confirmed positive cases ( $r_i^c$ ) during period  $i$  as  
 248  $r_i^c = c_i/c_{i-1}$  and  $r_i^T = T_i/T_{i-1}$ , respectively, where  $T_{i-1}$ ,  $T_i$  denote the number of tests carried  
 249 out in two consecutive periods, and  $c_{i-1}$ ,  $c_i$  denote the number of positive cases detected in these  
 250 periods. We classify a testing period as adequate when the rate of change in testing is greater than  
 251 the rate of change in cases; otherwise, if the rate of change in testing is lower/equal to the rate of  
 252 change in cases, we conclude that testing is inadequate. We summarize various scenarios of testing  
 253 adequacy in [Table 1](#). Our determination of testing adequacy, and thus suitability for model training  
 254 for both linear and deconvolution models, assumes that observed cases would be sufficiently close  
 255 to actual cases when testing rates are high compared to case rates and test positivity remains low  
 256 as determined through the community screening programs.

Table 1: Test and case scenarios to assess adequacy in testing for training periods.

| Scenario                                                                  | Sub-Scenario                                                 | Classification |
|---------------------------------------------------------------------------|--------------------------------------------------------------|----------------|
| Testing and cases increase, $T_i \geq T_{i-1}$ , $c_i \geq c_{i-1}$       | Cases increase faster than testing, then $r_i^T \leq r_i^c$  | Not adequate   |
|                                                                           | Testings increase faster than cases, then $r_i^T \geq r_i^c$ | Adequate       |
| Testing and cases decrease, $T_i < T_{i-1}$ , $c_i < c_{i-1}$             | Testing decreases faster than cases, then $r_i^T < r_i^c$    | Not adequate   |
|                                                                           | Cases decrease faster than tests, then $r_i^T > r_i^c$       | Adequate       |
| Testing increase and cases decrease, $T_i \geq T_{i-1}$ , $c_i < c_{i-1}$ | Then, $r_i^T \geq r_i^c$                                     | Adequate       |
| Testing decrease and cases increase, $T_i < T_{i-1}$ , $c_i \geq c_{i-1}$ | Then, $r_i^T \leq r_i^c$                                     | Not adequate   |

## 257 2.8 Effective reproductive number

258 The number of people in a population who are susceptible to infection by an infected individual at  
 259 any particular time is denoted by  $R_e$ , the effective reproductive number. This dimensionless quantity  
 260 is sensitive to time-dependent variation due to reductions in susceptible individuals, changes in  
 261 population immunity, and other factors.  $R_e$  can be estimated by the ratio of the number of new  
 262 infections ( $I_t$ ) generated at time  $t$ , to the total infectious individuals at time  $t$ , given by  $\sum_{s=1}^t I_{t-s} w_s$ ,  
 263 the sum of infection incidence up to time step  $t - 1$ , weighted by the infectivity function  $w_s$ . We  
 264 implemented Cori et al.’s approach<sup>39</sup> to estimate  $R_e$  directly from observed cases and from cases  
 265 that were estimated from the WW data.

## 266 3 Results

### 267 3.1 Identification of adequate training periods

268 We computed the rate of change in the number of tests and cases by week for the City of Davis  
 269 between December 1, 2021, and March 31, 2022 ([Figure 2](#) and [Table S6](#)). Each week was compared  
 270 with a previous week and classified as adequate whenever the rate of change in tests was greater  
 271 than the rate of change in cases and as not adequate otherwise.



272 **Figure 2** illustrates two specific training periods assumed for the analysis of the City of Davis.  
 273 The first training period includes data from December 12, 2021 to January 8, 2022 (red region,  
 274 denoted by  $T_{NA}$ ), and the second training period assumes data from January 9 to February 2, 2022  
 275 (green region,  $T_A$ ). A training period designated by  $T_{NA}$  (Not Adequate) corresponds to a scenario  
 276 where test rate is consistently lower than the rate of new cases. Similarly, a training period denoted  
 277 by  $T_A$  corresponds to a scenario in which the testing rate exceeds the rate of new cases. We assess  
 278 testing adequacy for Woodland and UC Davis (**Figures S1 and S3**), and similarly identified a period  
 279 of inadequate testing prior to an observed surge in infections..

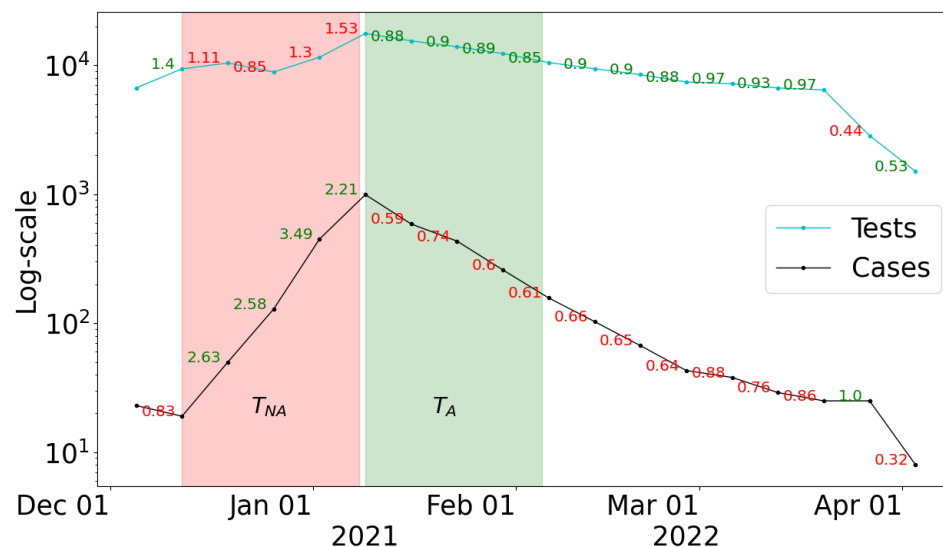

Figure 2: Number of tests administered in the City of Davis (cyan line) and cases (black line) by week, on a log-scale, from December 1, 2021 to March 31, 2022. The week-to-week rate of change in cases and tests are displayed; green numbers indicate the test rate is greater than the case rate, and red numbers are the opposite. The green and red shaded region correspond training periods with Adequate ( $T_A$ ) and Not Adequate ( $T_{NA}$ ) testing, respectively.

### 280 3.2 Comparison of models to estimate public health metrics from wastewater 281 data

282 We applied both a deconvolution technique and a linear regression to reconstruct incident cases  
 283 of COVID-19 from the WW data, assuming model training periods according to the adequacy of  
 284 clinical testing efforts. We found that the magnitude of case projections and trends was sensitive to  
 285 the assumption of the model training period for both model constructs (**Figure 3**), but the timing  
 286 of peaks in cases predicted were independent of the training period. Case predictions from the  
 287 models that assumed a training period with inadequate testing ( $T_{NA}$ ) were consistently lower than  
 288 projections from the models that assumed a training period with adequate testing ( $T_A$ ). These  
 289 results suggest that models using  $T_{NA}$  systematically underestimated true case counts, a finding  
 290 consistent with our expectations since fewer cases are detected during periods of inadequate clinical  
 291 testing than when testing is adequate. Projection of cases from the models using  $T_A$  aligned more  
 292 consistently with observed cases in periods where testing was deemed adequate. The difference in

293 predictions in cases from the two training periods was particularly evident in January 2021, during  
294 the onset of the Omicron variant surge in Davis.

295 Incident case projections from the linear model that assumed  $T_A$  was able to capture the peak  
296 of the curve more closely than the deconvolution model, although with greater uncertainty. It is  
297 worth noting that results from the deconvolution and the linear models are similar because the  
298 linear model is fitted with the 7-day moving-average of case data. Data smoothing of this kind  
299 corresponds to a convolution with equal daily weights. The estimation of cases from the linear  
300 regression model that  $T_{NA}$  was similar to the results of the deconvolution model, [Figure 3B](#).

301  $R_e$  monitors changes in disease transmission over time, assesses the effectiveness of interventions,  
302 and can be useful to guide policy decision making. Estimates of  $R_e$  from the median of the predicted  
303 cases using the deconvolution model and the linear model are similar. In most of the time period  
304 assessed,  $R_e$  determined from WW results are quite similar in magnitude and follow the trends  
305 for  $R_e$  calculated using observed cases ([Figure 4B](#)). A notable difference between the  $R_e$  estimated  
306 with the observed cases and that obtained with the WW data with both the linear model and the  
307 deconvolution model occurs at the end of March. At this time, the median of  $R_e$  for cases is below  
308 1, and the median of  $R_e$  with WW data for the linear and deconvolution model are above 1. A value  
309 of  $R_e$  lower than 1 indicates that overall transmission is declining, while thresholds higher than 1  
310 suggest that an outbreak is expected to continue.<sup>39</sup> The posterior analysis using the estimated  $R_e$   
311 from WW data thus indicates that an outbreak may have occurred in Davis that was not detected  
312 through clinical cases [Figure S5](#).

313 We demonstrate the adaptability of our methodology using data for Woodland and UC Davis  
314 and present results in the Supplemental Material ([Figures S1 and S3](#)). The trends of the observed  
315 cases is recovered with both models ([Figures S2 and S4](#)), yielding results consistent with those  
316 obtained for Davis.

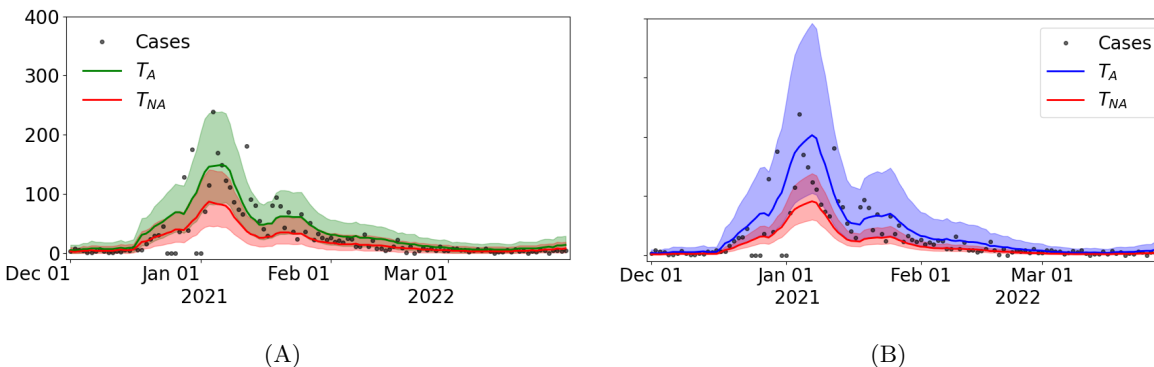

Figure 3: Predicted cases assuming (A) the deconvolution and (B) the linear regression models from WW data between December 1, 2021, and March 31, 2022. The estimated cases are displayed in green(blue) for the deconvolution(linear) model, when the models were trained on the period classified as adequate ( $T_A$ ), and in red when both models were trained on the period classified as inadequate ( $T_{NA}$ ). Solid lines represent median estimates of cases, and 95% prediction intervals are depicted in shaded regions.

317 The code implemented for the study are available in the github repository [??](#). Analyses were  
318 carried out using Python version 3.

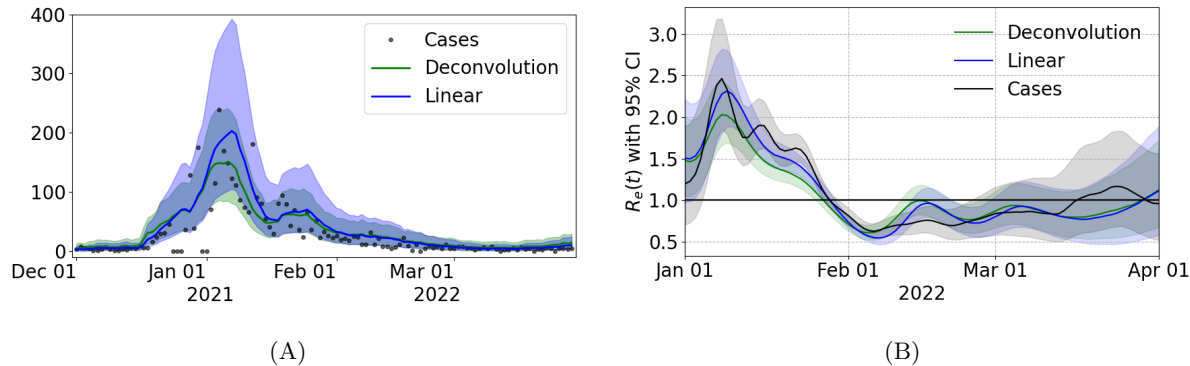

Figure 4: (A) Cases predicted with the linear regression model (blue) and the deconvolution model (green) using WW data between December 1, 2021, and March 31, 2022. Both models were trained in the period classified as appropriate ( $T_A$ ). (B) Effective  $R_e$  of city of Davis computed with the median of the cases estimated for the deconvolution model (blue) and the linear regression (green).

## 4 Discussion

Community-wide testing has played a critical role in mitigating the COVID-19 pandemic. However, large-scale testing has been limited and falls further behind during surges of infections. We developed criteria to classify the adequacy of clinical testing in a community through time, and we applied the classification scheme to three Northern California communities. As was observed in many other communities at the time, we found that clinical testing was inadequate at the front end of the wave of Omicron infections that occurred during our study period. Inadequate clinical testing during surges of infection makes it particularly challenging to discern true levels of SARS-CoV-2 infections in a population. WBE can fill data gaps caused by inadequate testing programs. As clinical testing transitions further towards at-home self-testing, measurements of SARS-CoV-2 RNA in wastewater can serve as an increasingly important indicator for COVID-19 transmission.

Myriad sources of variability and uncertainty in WW data can nevertheless impact the accuracy of estimates of COVID-19 cases or other public health metrics derived from WW data.<sup>40–43</sup> Statistically representative samples can also be difficult to obtain because of the complexity of wastewater collection systems and the physical challenge of ensuring consistency in sample acquisition and processing.<sup>44</sup> Such challenges can limit comparability of wastewater results across different WBE programs. The modeling framework we described to estimate COVID-19 cases from WW data accounts for uncertainty and relies on short training periods using clinical testing data to calibrate wastewater measurements to local conditions.

We showed that case projections reconstructed from either the Bayesian deconvolution or the simple linear model were generally higher than cases observed through clinical testing, particularly during periods with sub-optimal testing. These results are not surprising, as we expected that the WW models would yield case estimates higher than cases observed through screening given that WW is not subject to the same selection biases as testing. While both the deconvolution and linear regression models captured the overall trends in observed cases overall, qualitative differences were evident between the approaches, particularly when testing was limited. Both models identified steep upward trends in cases during the surge in mid-January and at the onset of the Omicron surge [Figure 4A](#).

The classification approach that we developed to assess the adequacy of model training periods was essential to providing robust estimates of case projections. Training periods that satisfied the

349 proposed characteristics (i.e., adequate testing) resulted in similar estimates from each of the models,  
350 and yielded trends that were consistent with observed cases. Case projections that assumed training  
351 periods with poor testing generally underestimated cases compared to projections from adequate  
352 training periods. While the proposed models do not seek to recover the curve of reported cases  
353 (an underestimate of actual cases specially in a limited testing scenario), use of adequate training  
354 periods for the WW models enabled us to capture trends in case counts much more closely. It is  
355 evident that training periods with inadequate testing introduce a downward bias into the model.

356 WBE has substantially lower resource requirements than mass diagnostic testing, and WW data  
357 lack bias from care- and test-seeking behavior in the catchment population. WBE programs that  
358 determine COVID-19 public health metrics at the community level can work as a powerful and  
359 cost-effective complement to other, more traditional intervention methods. The analytic methods  
360 presented here can inform local public health policy and community-level interventions, for in-  
361 stance by helping to assess when initiation of clinical screening programs and non-pharmaceutical  
362 interventions are needed. The model can be especially valuable to fill data gaps during surges of  
363 infection when clinical testing is inadequate and could be used to assess when estimates of case rates  
364 exceed certain thresholds. WBE does come with the inherent challenge of determining the popula-  
365 tions being monitored, the effect of which is exacerbated if the population served is highly mobile  
366 (e.g., a university campus). In other words, WBE methods for tracking COVID-19 are inherently  
367 location-specific, whereas public screening programs are tied to the people they serve. Calibration  
368 of wastewater models using clinical data will be most robust in places with minimal mobility or  
369 within populations that are adequately described and understood.

370 With screening programs winding down across the United States, finding training periods with  
371 adequate testing rates may not be feasible. In such cases, application of the deconvolution model for  
372 WBE can still highlight important trends. Where tests are only administered for clinical diagnostics,  
373 a periodic sentinel system could be employed to produce sufficient prevalence estimates for training  
374 periods. Such a system would recruit a representative sample of the population for repeated testing  
375 during a training period to establish a baseline, which then enables the wastewater deconvolution  
376 model to track incidence for an extended period of time. The same sentinel group could be called  
377 back later when the model needs to be updated to retrain for new situations.

378 WBE surveillance systems should be cognizant that they are not unduly targeting and stig-  
379 matizing vulnerable communities. WBE is much less invasive than diagnostic testing and protects  
380 individual identities, thereby avoiding the stigmatization of individuals and not requiring individ-  
381 ual consent.<sup>45</sup> Yet focusing too heavily on public surveillance efforts can negatively influence public  
382 perception of those being monitored.<sup>46</sup> Mathematical models that employ machine learning, such  
383 as the deconvolution model described herein, must be trained with data sets that are not sampled  
384 by biased collection methods, else they may inadvertently reintroduce social biases into the results  
385 and contribute to larger inequities in public health.

## 386 Human Participant Protection

387 This study was determined to be exempt from institutional review board review by the UC Davis  
388 Office of Research.

## 389 Acknowledgments

390 M.L.D.T and J.C.M.L., literature review, model development, implementation, wrote overall first  
391 draft of paper, paper revisions. M.K., analytical assay development and quality control, writing

392 methods. R.O., laboratory process management, quality control, data collection, writing methods.  
393 L.R. and C.W.B.: laboratory processing and wastewater data collection, writing methods. L.T.  
394 literature review and initial model evaluation. L.T. and M.S., partner engagement and project  
395 management. Y.E.G. and A.S., literature review, paper writing and editing. K.S. and C.N.,  
396 wastewater monitoring project supervision. Pollock B., Healthy Davis Together project PI, paper  
397 editing/revision. M.N., model development, research oversight/supervision, paper editing/revision.  
398 H.N.B., Healthy Central Valley Together project PI; project conception, funding, research oversight  
399 and collaborator coordination, paper editing/revision.

400 This research was supported by the Healthy Central Valley Together (HCVT) and Healthy  
401 Davis Together (HDT) programs at the University of California, Davis. This research was also  
402 supported in part by the NIH Rapid Acceleration of Diagnostics (RADxSM) initiative with federal  
403 funds from the National Institute of Biomedical Imaging and Bioengineering, National Institutes  
404 of Health. The current contract is funded from the Public Health and Social Services Emergency  
405 Fund through the Biomedical Advanced Research and Development Authority, HHS Office of the  
406 Assistant Secretary for Preparedness and Response, Department of Health and Human Services,  
407 under Contract No. 75N92021C00012. All authors reviewed and approved the final manuscript.

## References

- 408
- 409 [1] Olivier Vandenberg, Delphine Martiny, Olivier Rochas, Alex van Belkum, and Zisis Kozlakidis.  
410 Considerations for diagnostic covid-19 tests. *Nature Reviews Microbiology*, 19(3):171–183, 2021.  
411 [doi:10.1038/s41579-020-00461-z](https://doi.org/10.1038/s41579-020-00461-z).
- 412 [2] Angela E Raffle, Allyson M Pollock, and Louisa Harding-Edgar. Covid-19 mass testing pro-  
413 grammes. *BMJ*, 370, 2020. [doi:10.1136/bmj.m3262](https://doi.org/10.1136/bmj.m3262).
- 414 [3] Tim R Mercer and Marc Salit. Testing at scale during the covid-19 pandemic. *Nature Reviews*  
415 *Genetics*, 22:415–426, 2021. [doi:10.1038/s41576-021-00360-w](https://doi.org/10.1038/s41576-021-00360-w).
- 416 [4] Yan Mardian, Herman Kosasih, Muhammad Karyana, Aaron Neal, and Chuen-Yen Lau. Re-  
417 view of current covid-19 diagnostics and opportunities for further development. *Frontiers in*  
418 *Medicine*, 8, 2021. [doi:10.3389/fmed.2021.615099](https://doi.org/10.3389/fmed.2021.615099).
- 419 [5] Ettore Zuccato, Chiara Chiabrando, Sara Castiglioni, Davide Calamari, Renzo Bagnati, Silvia  
420 Schiarea, and Roberto Fanelli. Cocaine in surface waters: a new evidence-based tool to monitor  
421 community drug abuse. *Environmental Health*, 4(1):1–7, 2005. [doi:10.1186/1476-069X-4-14](https://doi.org/10.1186/1476-069X-4-14).
- 422 [6] Sara Castiglioni, Kevin V Thomas, Barbara Kasprzyk-Hordern, Liesbeth Vandam, and Paul  
423 Griffiths. Testing wastewater to detect illicit drugs: state of the art, potential and research  
424 needs. *Science of the Total Environment*, 487:613–620, 2014. [doi:10.1016/j.scitotenv.](https://doi.org/10.1016/j.scitotenv.2013.10.034)  
425 [2013.10.034](https://doi.org/10.1016/j.scitotenv.2013.10.034).
- 426 [7] Phil M Choi, Benjamin Tschärke, Saer Samanipour, Wayne D Hall, Coral E Gartner,  
427 Jochen F Mueller, Kevin V Thomas, and Jake W O'Brien. Social, demographic, and  
428 economic correlates of food and chemical consumption measured by wastewater-based epi-  
429 demiology. *Proceedings of the National Academy of Sciences*, 116(43):21864–21873, 2019.  
430 [doi:10.1073/pnas.1910242116](https://doi.org/10.1073/pnas.1910242116).
- 431 [8] Humayun Asghar, Ousmane M Diop, Goitom Weldegebriel, Farzana Malik, Sushmitha Shetty,  
432 Laila El Bassioni, Adefunke O Akande, Eman Al Maamoun, Sohail Zaidi, Adekunle J Adeniji,  
433 et al. Environmental surveillance for polioviruses in the global polio eradication initiative. *The*  
434 *Journal of Infectious Diseases*, 210(suppl\_1):S294–S303, 2014. [doi:10.1093/infdis/jiu384](https://doi.org/10.1093/infdis/jiu384).
- 435 [9] Juan A. Vallejo, Noelia Trigo-Tasende, Soraya Rumbo-Feal, Kelly Conde-Pérez, Ángel López-  
436 Oriona, Inés Barbeito, Manuel Vaamonde, Javier Tarrío-Saavedra, Rubén Reif, Susana Ladra,  
437 Bruno K. Rodiño-Janeiro, Mohammed Nasser-Ali, Ángeles Cid, María Veiga, Antón Acevedo,  
438 Carlos Lamora, Germán Bou, Ricardo Cao, and Margarita Poza. Modeling the number of  
439 people infected with sars-cov-2 from wastewater viral load in northwest spain. *Science of The*  
440 *Total Environment*, 811:152334, 2022. [doi:https://doi.org/10.1016/j.scitotenv.2021.](https://doi.org/10.1016/j.scitotenv.2021.152334)  
441 [152334](https://doi.org/10.1016/j.scitotenv.2021.152334).
- 442 [10] Jana S. Huisman, Jérémie Scire, Lea Caduff, Xavier Fernandez-Cassi, Pravin Ganesan-  
443 damoorthy, Anina Kull, Andreas Scheidegger, Elyse Stachler, Alexandria B. Boehm, Brid-  
444 gette Hughes, Alisha Knudson, Aaron Topol, Krista R. Wigginton, Marlene K. Wolfe, Tamar  
445 Kohn, Christoph Ort, Tanja Stadler, and Timothy R. Julian. Wastewater-based estimation of  
446 the effective reproductive number of sars-cov-2. *medRxiv*, 2022. [doi:10.1101/2021.04.29.](https://doi.org/10.1101/2021.04.29.21255961)  
447 [21255961](https://doi.org/10.1101/2021.04.29.21255961).

- 448 [11] Christopher S McMahan, Stella Self, Lior Rennert, Corey Kalbaugh, David Kriebel, Duane  
449 Graves, Cameron Colby, Jessica A Deaver, Sudeep C Papat, Tanju Karanfil, and David L  
450 Freedman. Covid-19 wastewater epidemiology: a model to estimate infected populations. *The  
451 Lancet Planetary Health*, 5(12):e874–e881, 2021. doi:10.1016/S2542-5196(21)00230-8.
- 452 [12] Marlene K. Wolfe, Aaron Topol, Alisha Knudson, Adrian Simpson, Bradley White, Duc J. Vu-  
453 gia, Alexander T. Yu, Linlin Li, Michael Balliet, Pamela Stoddard, George S. Han, Krista R.  
454 Wigginton, Alexandria B. Boehm, and Charles R. Langelier. High-frequency, high-throughput  
455 quantification of sars-cov-2 rna in wastewater settled solids at eight publicly owned treat-  
456 ment works in northern california shows strong association with covid-19 incidence. *mSystems*,  
457 6(5):e00829–21, 2021. doi:10.1128/mSystems.00829-21.
- 458 [13] Summary of global sars-cov-2 wastewater monitoring efforts by uc merced researchers. <https://www.arcgis.com/apps/dashboards/c778145ea5bb4daeb58d31afee389082>. (Accessed on  
459 06/14/2022).  
460
- 461 [14] Smriti Mallapaty et al. How sewage could reveal true scale of coronavirus outbreak. *Nature*,  
462 580(7802):176–177, 2020. doi:10.1038/d41586-020-00973-x.
- 463 [15] Jordan Peccia, Alessandro Zulli, Doug E Brackney, Nathan D Grubaugh, Edward H Kaplan,  
464 Arnau Casanovas-Massana, Albert I Ko, Aryn A Malik, Dennis Wang, Mike Wang, et al.  
465 Measurement of sars-cov-2 rna in wastewater tracks community infection dynamics. *Nature  
466 Biotechnology*, 38(10):1164–1167, 2020. doi:10.1038/s41587-020-0684-z.
- 467 [16] Gertjan Medema, Leo Heijnen, Goffe Elsinga, Ronald Italiaander, and Anke Brouwer. Presence  
468 of sars-coronavirus-2 rna in sewage and correlation with reported covid-19 prevalence in the  
469 early stage of the epidemic in the netherlands. *Environmental Science & Technology Letters*,  
470 7(7):511–516, 2020. doi:10.1021/acs.estlett.0c00357.
- 471 [17] S Wurtzer, V Marechal, JM Mouchel, Y Maday, R Teyssou, E Richard, JL Almayrac, and  
472 L Moulin. Evaluation of lockdown impact on sars-cov-2 dynamics through viral genome quan-  
473 tification in paris wastewaters. *medRxiv*, 2020. doi:10.1101/2020.04.12.20062679.
- 474 [18] Shimoni Shah, Sylvia Xiao Wei Gwee, Jamie Qiao Xin Ng, Nicholas Lau, Jiayun Koh, and Junx-  
475 iong Pang. Wastewater surveillance to infer covid-19 transmission: A systematic review. *Science  
476 of The Total Environment*, 804:150060, 2022. doi:10.1016/j.scitotenv.2021.150060.
- 477 [19] Amy E Kirby, Rory M Welsh, Zachary A Marsh, Alexander T Yu, Duc J Vugia, Alexandria B  
478 Boehm, Marlene K Wolfe, Bradley J White, Shannon R Matzinger, Allison Wheeler, et al.  
479 Notes from the field: Early evidence of the sars-cov-2 b. 1.1. 529 (omicron) variant in community  
480 wastewater—united states, november–december 2021. *Morbidity and Mortality Weekly Report*,  
481 71(3):103–105, 2022. doi:10.15585/mmwr.mm7103a5.
- 482 [20] Leanne Pillay, Isaac Dennis Amoah, Nashia Deepnarain, Kriveshin Pillay, Oluyemi Olatunji  
483 Awolusi, Sheena Kumari, and Faizal Bux. Monitoring changes in covid-19 infection using  
484 wastewater-based epidemiology: A south african perspective. *Science of The Total Environ-  
485 ment*, 786:147273, 2021. doi:https://doi.org/10.1016/j.scitotenv.2021.147273.
- 486 [21] Aikaterini Galani, Reza Aalizadeh, Marios Kostakis, Athina Markou, Nikiforos Alygizakis,  
487 Theodore Lytras, Panagiotis G Adamopoulos, Jordan Peccia, David C Thompson, Aikaterini  
488 Kontou, et al. Sars-cov-2 wastewater surveillance data can predict hospitalizations and icu

- 489 admissions. *Science of The Total Environment*, 804:150151, 2022. doi:10.1016/j.scitotenv.  
490 2021.150151.
- 491 [22] Warish Ahmed, Aaron Bivins, Paul M Bertsch, Kyle Bibby, Phil M Choi, Kata Farkas, Pradip  
492 Gyawali, Kerry A Hamilton, Eiji Haramoto, Masaaki Kitajima, et al. Surveillance of sars-cov-2  
493 rna in wastewater: Methods optimization and quality control are crucial for generating reliable  
494 public health information. *Current Opinion in Environmental Science & Health*, 17:82–93,  
495 2020. doi:10.1016/j.coesh.2020.09.003.
- 496 [23] Gertjan Medema, Frederic Been, Leo Heijnen, and Susan Petterson. Implementation of en-  
497 vironmental surveillance for sars-cov-2 virus to support public health decisions: Opportuni-  
498 ties and challenges. *Current Opinion in Environmental Science & Health*, 17:49–71, 2020.  
499 doi:10.1016/j.coesh.2020.09.006.
- 500 [24] Kelly Hill, Arash Zamyadi, Dan Deere, Peter A. Vanrolleghem, and Nicholas D. Cros-  
501 bie. SARS-CoV-2 known and unknowns, implications for the water sector and wastewater-  
502 based epidemiology to support national responses worldwide: early review of global experi-  
503 ences with the COVID-19 pandemic. *Water Quality Research Journal*, 56(2):57–67, 05 2020.  
504 doi:10.2166/wqrj.2020.100.
- 505 [25] Yifan Zhu, Wakana Oishi, Chikako Maruo, Mayuko Saito, Rong Chen, Masaaki Kitajima, and  
506 Daisuke Sano. Early warning of covid-19 via wastewater-based epidemiology: potential and  
507 bottlenecks. *Science of The Total Environment*, 767:145124, 2021. doi:10.1016/j.scitotenv.  
508 2021.145124.
- 509 [26] Sílvia Monteiro, Daniela Rente, Mónica V. Cunha, Manuel Carmo Gomes, Tiago A. Marques,  
510 Artur B. Lourenço, Eugénia Cardoso, Pedro Álvaro, Marco Silva, Norberta Coelho, João Vilaça,  
511 Fátima Meireles, Nuno Brôco, Marta Carvalho, and Ricardo Santos. A wastewater-based  
512 epidemiology tool for covid-19 surveillance in portugal. *Science of The Total Environment*,  
513 804:150264, 2022. doi:10.1016/j.scitotenv.2021.150264.
- 514 [27] Mary E Schoen, Marlene K Wolfe, Linlin Li, Dorothea Duong, Bradley J White, Bridgette  
515 Hughes, and Alexandria B Boehm. Sars-cov-2 rna wastewater settled solids surveillance fre-  
516 quency and impact on predicted covid-19 incidence using a distributed lag model. *ACS ES&T*  
517 *Water*, 2022. doi:10.1021/acsestwater.2c00074.
- 518 [28] Smruthi Karthikeyan, Nancy Ronquillo, Pedro Belda-Ferre, Destiny Alvarado, Tara Javidi,  
519 Christopher A. Longhurst, Rob Knight, and Ileana M. Cristea. High-throughput wastewater  
520 sars-cov-2 detection enables forecasting of community infection dynamics in san diego county.  
521 *mSystems*, 6(2):e00045–21, 2021. doi:10.1128/mSystems.00045-21.
- 522 [29] Healthy Davis Together. Testing. <https://healthydavistogether.org/testing-data/>.  
523 (Accessed on 05/23/2022).
- 524 [30] Healthy yolo together. <https://healthydavistogether.org/>. (Accessed on 05/23/2022).
- 525 [31] Anne Weiss, Mads Jellingsø, and Morten Otto Alexander Sommer. Spatial and tempo-  
526 ral dynamics of sars-cov-2 in covid-19 patients: A systematic review and meta-analysis.  
527 *EBioMedicine*, 58:102916, 2020. doi:10.1016/j.ebiom.2020.102916.
- 528 [32] Muge Cevik, Matthew Tate, Ollie Lloyd, Alberto Enrico Maraolo, Jenna Schafers, and Antonia  
529 Ho. Sars-cov-2, sars-cov-1 and mers-cov viral load dynamics, duration of viral shedding and



- 530 infectiousness: a living systematic review and meta-analysis. *SARS-CoV-1 and MERS-CoV*  
531 *Viral Load Dynamics, Duration of Viral Shedding and Infectiousness: A Living Systematic*  
532 *Review and Meta-Analysis*, 2020. doi:[10.2139/ssrn.3677918](https://doi.org/10.2139/ssrn.3677918).
- 533 [33] Cecilia LH Xu, Manjri Raval, Jesse A Schnall, Jason C Kwong, and Natasha E Holmes. Duration  
534 of respiratory and gastrointestinal viral shedding in children with sars-cov-2: a systematic  
535 review and synthesis of data. *The Pediatric Infectious Disease Journal*, 39(9):e249–e256, 2020.  
536 doi:[10.1097/INF.0000000000002814](https://doi.org/10.1097/INF.0000000000002814).
- 537 [34] Edward Goldstein, Jonathan Dushoff, Junling Ma, Joshua B Plotkin, David JD Earn, and  
538 Marc Lipsitch. Reconstructing influenza incidence by deconvolution of daily mortality time  
539 series. *Proceedings of the National Academy of Sciences*, 106(51):21825–21829, 2009. doi:  
540 [10.1073/pnas.0902958106](https://doi.org/10.1073/pnas.0902958106).
- 541 [35] Andreas Lindén and Samu Mäntyniemi. Using the negative binomial distribution to model  
542 overdispersion in ecological count data. *Ecology*, 92(7):1414–1421, 2011. doi:[10.1890/](https://doi.org/10.1890/10-1831.1)  
543 [10-1831.1](https://doi.org/10-1831.1).
- 544 [36] Amy E Benefield, Laura A Skrip, Andrea Clement, Rachel A Althouse, Stewart Chang, and  
545 Benjamin M Althouse. Sars-cov-2 viral load peaks prior to symptom onset: a systematic  
546 review and individual-pooled analysis of coronavirus viral load from 66 studies. *medRxiv*, 2020.  
547 doi:[10.1101/2020.09.28.20202028](https://doi.org/10.1101/2020.09.28.20202028).
- 548 [37] J Andrés Christen, Colin Fox, et al. A general purpose sampling algorithm for continuous  
549 distributions (the t-walk). *Bayesian Analysis*, 5(2):263–281, 2010. doi:[10.1214/10-BA603](https://doi.org/10.1214/10-BA603).
- 550 [38] David J Spiegelhalter, Nicola G Best, Bradley P Carlin, and Angelika Van Der Linde. Bayesian  
551 measures of model complexity and fit. *Journal of the Royal Statistical Society: Series b (Sta-*  
552 *tistical Methodology)*, 64(4):583–639, 2002. doi:[10.1111/1467-9868.00353](https://doi.org/10.1111/1467-9868.00353).
- 553 [39] Anne Cori, Neil M Ferguson, Christophe Fraser, and Simon Cauchemez. A new framework and  
554 software to estimate time-varying reproduction numbers during epidemics. *American Journal*  
555 *of Epidemiology*, 178(9):1505–1512, 2013. doi:[10.1093/aje/kwt133](https://doi.org/10.1093/aje/kwt133).
- 556 [40] Xuan Li, Shuxin Zhang, Jiahua Shi, Stephen P Luby, and Guangming Jiang. Uncertainties  
557 in estimating sars-cov-2 prevalence by wastewater-based epidemiology. *Chemical Engineering*  
558 *Journal*, 415:129039, 2021. doi:[10.1016/j.cej.2021.129039](https://doi.org/10.1016/j.cej.2021.129039).
- 559 [41] Rezar Arabzadeh, Daniel Martin Grünbacher, Heribert Insam, Norbert Kreuzinger, Rudolf  
560 Markt, and Wolfgang Rauch. Data filtering methods for sars-cov-2 wastewater surveillance.  
561 *Water Science and Technology*, 84(6):1324–1339, 2021. doi:[10.2166/wst.2021.343](https://doi.org/10.2166/wst.2021.343).
- 562 [42] E Belia, Y Amerlinck, Lorenzo Benedetti, B Johnson, Gürkan Sin, Peter A Vanrolleghem,  
563 KV Gernaey, S Gillot, MB Neumann, L Rieger, et al. Wastewater treatment modelling: dealing  
564 with uncertainties. *Water Science and Technology*, 60(8):1929–1941, 2009. doi:[10.2166/wst.](https://doi.org/10.2166/wst.2009.225)  
565 [2009.225](https://doi.org/10.2166/wst.2009.225).
- 566 [43] Marie Courbariaux, Nicolas Cluzel, Siyun Wang, Vincent Maréchal, Laurent Moulin, Sébastien  
567 Wurtzer, Obépine consortium, Jean-Marie Mouchel, Yvon Maday, and Grégory Nuel. A flexible  
568 smoother adapted to censored data with outliers and its application to sars-cov-2 monitoring  
569 in wastewater. *arXiv*, 2022. URL: <https://arxiv.org/abs/2108.02115v3>.

- 570 [44] Deepak Panchal, Om Prakash, Prakash Bobde, and Sukdeb Pal. Sars-cov-2: sewage surveillance  
571 as an early warning system and challenges in developing countries. *Environmental Science and*  
572 *Pollution Research*, 28(18):22221–22240, 2021. doi:[doi.org/10.1007/s11356-021-13170-8](https://doi.org/10.1007/s11356-021-13170-8).
- 573 [45] Michio Murakami, Akihiko Hata, Ryo Honda, and Toru Watanabe. Letter to the editor:  
574 Wastewater-based epidemiology can overcome representativeness and stigma issues related to  
575 covid-19. *Environmental Science & Technology*, 54(9):5311–5311, 2020. PMID: 32323978.  
576 doi:[10.1021/acs.est.0c02172](https://doi.org/10.1021/acs.est.0c02172).
- 577 [46] Natalie Sims and Barbara Kasprzyk-Hordern. Future perspectives of wastewater-based epi-  
578 demiology: Monitoring infectious disease spread and resistance to the community level. *Envi-*  
579 *ronment International*, 139:105689, 2020. doi:[10.1016/j.envint.2020.105689](https://doi.org/10.1016/j.envint.2020.105689).
- 580 [47] Cdc 2019-novel coronavirus (2019-ncov) real-time rt-pcr diagnostic panel. [https://www.fda.](https://www.fda.gov/media/134922/download)  
581 [gov/media/134922/download](https://www.fda.gov/media/134922/download).
- 582 [48] Nicola Decaro, Gabriella Elia, Marco Campolo, Costantina Desario, Viviana Mari, Arianna  
583 Radogna, Maria Loredana Colaianni, Francesco Cirone, Maria Tempesta, and Canio Buon-  
584 avoglia. Detection of bovine coronavirus using a taqman-based real-time rt-pcr assay. *Journal*  
585 *of Virological Methods*, 151(2):167–171, 2008. doi:[10.1016/j.jviromet.2008.05.016](https://doi.org/10.1016/j.jviromet.2008.05.016).
- 586 [49] Eiji Haramoto, Masaaki Kitajima, Naohiro Kishida, Yoshiaki Konno, Hiroyuki Katayama,  
587 Mari Asami, and Michihiro Akiba. Occurrence of pepper mild mottle virus in drinking water  
588 sources in japan. *Applied and Environmental Microbiology*, 79(23):7413–7418, 2013. doi:  
589 [10.1128/AEM.02354-13](https://doi.org/10.1128/AEM.02354-13).

## 590 Supplementary Material

### 591 Results for City of Woodland

592 Figure S1A illustrates data from Woodland that was used to reconstruct cases from WW. Figure  
 593 S1B described the smoothed cases and N/PMMoV signals used to provide prediction of cases.  
 594 Figure S1C describes the training periods used for the analysis; one with adequate testing (shaded  
 595 in green, denoted by  $T_A$ ) and one in which testing was not adequate (shaded in red, denoted by  
 596  $T_{NA}$ ).

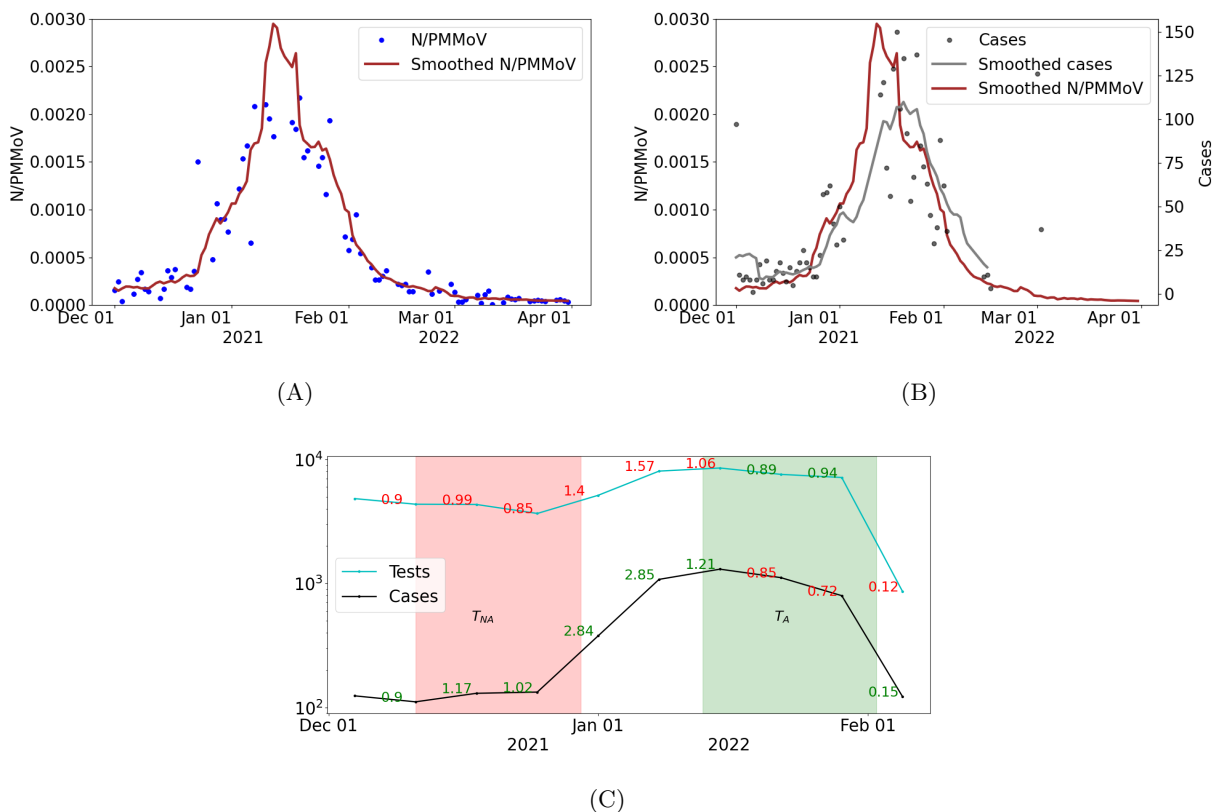

Figure S1: **City of Woodland:** (A) Wastewater data (N/PMMoV) and 10-day trimmed average (Smoothed N/PMMoV) from December 1, 2021 to March 31, 2022; (B) COVID-19 cases, 7-day moving average (Smoothed cases) for cases, and 10-day trimmed average for WW data (Smoothed N/PMMoV); (C) Number of tests administered and cases by week, on a log-scale, from December 1, 2021 to February 1, 2022. The week-to-week rate of change in cases and tests are printed with green labels (shaded-region) corresponding to period of adequate testing and red labels (shaded region) for periods in which testing is not adequate.

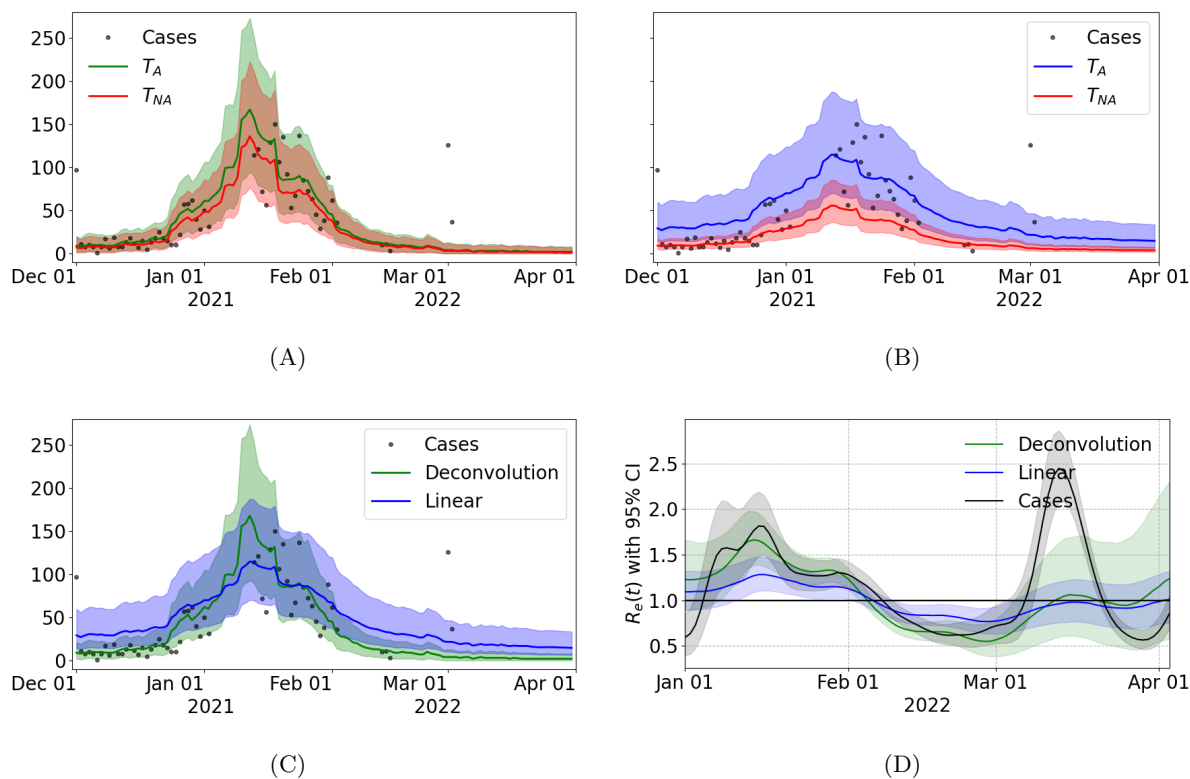

Figure S2: **City of Woodland**. Reconstruction of incident cases from the deconvolution model (A) and (B) linear regression model using WW data from December 1, 2021 to March 31, 2022. The estimated cases are display ( $T_A$ : January 13 - February 2, 2022), and red when the models are trained on the period classified as inadequate ( $T_{NA}$ : December 11-30, 2021). Solid lines represent median estimates of cases, and 95% prediction intervals are depicted in shaded regions. (C) Predicted cases using the linear regression model (blue) and the deconvolution (green) trained in the period selected as appropriate ( $T_A$ ). (D) Calculation of  $R_e$  from case data (black) and from cases reconstructed from WW data using the deconvolution model (green) and the linear regression (blue).

597 **Results for the UC Davis Campus**

598 **Figure S3A** illustrates data from UC Davis campus that was used to reconstruct cases from WW.  
 599 **Figure S3B** described the smoothed cases and N/PMMoV signals used to provide prediction of  
 600 cases. **Figure S3C** describes the training periods used for the analysis; one with adequate testing  
 601 (shaded in green, denoted by  $T_A$ ) and one in which testing was not adequate (shaded in red, denoted  
 602 by  $T_{NA}$ ).

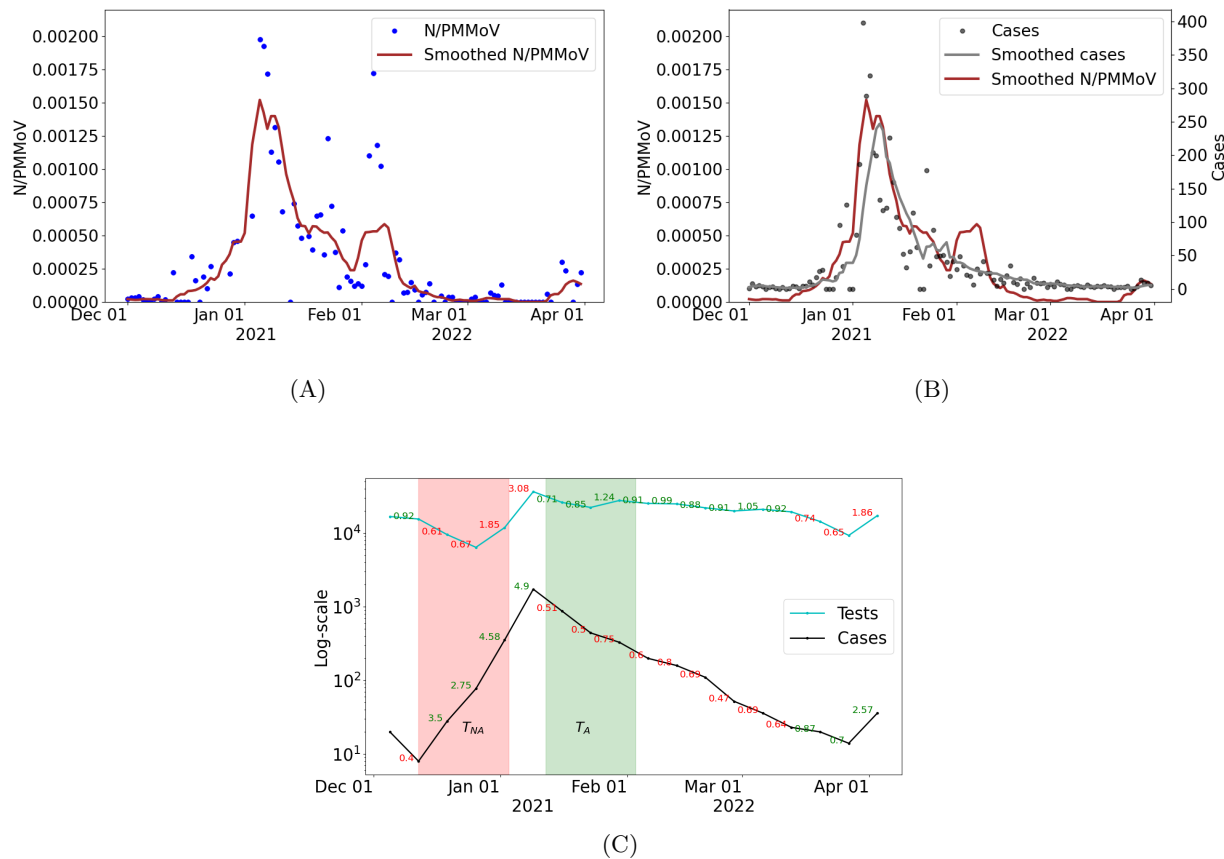

Figure S3: **UC Davis Campus**. (A) Wastewater data (N/PMMoV) and 10-day trimmed average (Smoothed N/PMMoV) from December 1, 2021 to March 31, 2022. (B) COVID-19 cases, 7-day moving average (Smoothed cases) for cases, and 10-day trimmed average for WW data (Smoothed N/PMMoV). (C) Number of tests administered and cases by week, on a log-scale, from December 1, 2021 to February 1, 2022. The week-to-week rate of change in cases and tests are printed, with green labels (and shaded-region) corresponding to period of adequate testing and red labels (and shaded region) for inadequate testing.

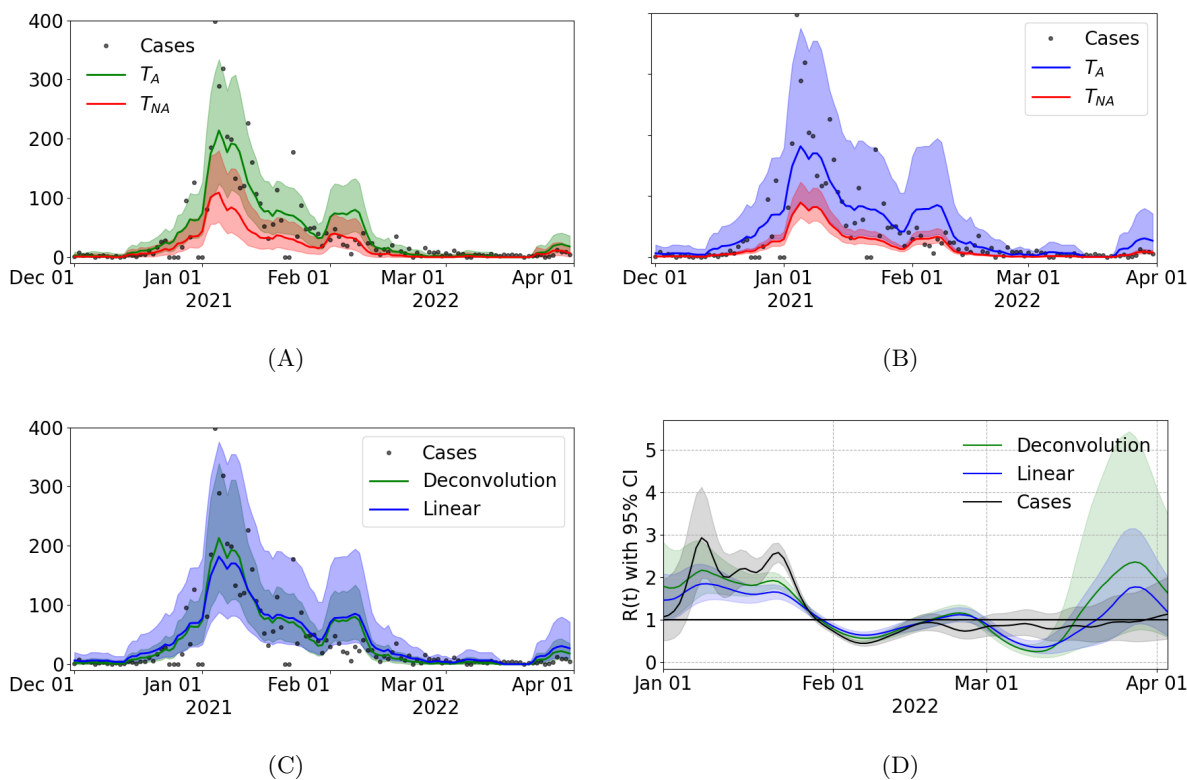

Figure S4: **UC Davis Campus**. Reconstruction of incident cases from the deconvolution (A) and (B) linear regression models from WW data between December 1, 2021, and March 31, 2022. The estimated cases are display ( $T_A$ : January 12 - February 3, 2022), and red when the models are trained on the period classified as inadequate ( $T_{NA}$ : December 12, 2021 - January 3, 2022). Solid lines represent median estimates of cases, and 95% prediction intervals are depicted in shaded regions. (C) Predicted cases using the linear regression model (blue) and the deconvolution (green) trained in the period selected as appropriate ( $T_A$ ). (d) Effective  $R_e$  computed with the median of the cases estimated for the deconvolution model (blue) and the linear regression (green).

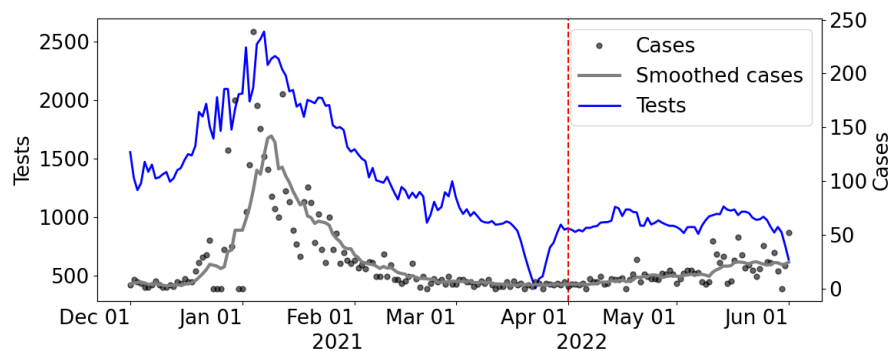

Figure S5: **City of Davis** data. COVID-19 cases, 7-day moving average (Smoothed cases) for cases, and number of tests administered from December 1, 2021 to June 1, 2022.

## 603 Laboratory quality control and data processing

604 The sensitivity of the analytical assay was assessed by determining a limit of detection (LOD) and  
605 a limit of blank (LOB) following protocols recommended by the ddPCR manufacturer (Bio-Rad  
606 Laboratories, 2020, A practical guide for evaluating detection capability using ddPCR.). Fifteen  
607 wastewater samples that were initially screened as negative for SARS-CoV-2 in routine wastewater  
608 ddPCR monitoring (i.e., extracts had less than 4 positive droplets in merged wells from duplicate  
609 analysis) were used to determine the lowest detectable concentrations in ostensibly blank wastewater  
610 samples. Selection of these extracts provided a conservative approach to determining the LOB. The  
611 selected extracts were re-analyzed by ddPCR to obtain data for four additional replicates for each  
612 sample. A non-parametric (rank order) method was then used to select the LOB, since results  
613 from the blank were not normally distributed. The ddPCR number of droplets from individual  
614 wells were tabulated from lowest to highest. The LOB was set at the value of the concentration  
615 measurement for the rank position corresponding to the 95th percentile, calculated as follows:  
616  $Rank = 0.5 + 0.95 * (\text{number of measurements})$ . Since the calculated rank position was a non-integer  
617 value, the rank position was rounded up to provide a more conservative LOB. The theoretical LOD  
618 was set as LOB plus two times the standard deviation of all replicate results (Biorad, 2020). The  
619 LOD and LOB are reported in [Table S5](#). In terms of droplet numbers in the blank samples, the  
620 highest numbers of positive droplets in the merged wells (four replicates) amongst the fifteen blank  
621 samples were 6 (N1) and 8 (N2). Since routine wastewater samples were analyzed in duplicate,  
622 3 (N1) and 4 (N2) droplets were set as the cutoff to mark samples below the droplet threshold.  
623 Samples were also considered below the droplet threshold if there were fewer N1 and N2 droplets  
624 twice the number of droplets in the extraction control blank analyzed on the same day. Runs with  
625 an extraction control blank that had  $> 15$  positive droplets in either N1 or N2 were considered  
626 contaminated and extracts were re-processed.

627 If samples passed all checks, the relative concentration of N gene was calculated as follows.  
628 Duplicate results for each target were merged, and the concentration of each target in the ddPCR  
629 reaction was calculated assuming a Poisson distribution using the QXOne Software 1.1.1 Standard  
630 Addition (Bio-Rad). The average SARS-CoV-2 RNA concentration in the initial wastewater sample  
631 was calculated from the average of the N1 and N2, corrected for sample and reagent volumes  
632 used, and reported as genome copies (gc) per mL wastewater. BCoV was detected in 100% of  
633 spiked samples, and concentrations of targets were not corrected for BCoV recovery efficiency. The  
634 average SARS-CoV-2 RNA concentration ( $N$ ), was divided by the concentration of PMMoV. If N1  
635 or N2 merged droplet counts were below the minimum droplet threshold, the target was excluded  
636 from the average concentration. If both N1 and N2 targets were below the droplet threshold, the  
637 concentration was reported as 0.

Table S1: RT-ddPCR primers and probes used in this study.

| Target                      | Primer/probe sequence (5', 3') |                                                             | Amplicon length | Source/Reference                                                            |
|-----------------------------|--------------------------------|-------------------------------------------------------------|-----------------|-----------------------------------------------------------------------------|
| SARS-CoV-2;<br>N1 gene      | Forward                        | GACCCCAAAATCAGCGAAAT                                        | 72              | U.S.Centers for Disease Control and Prevention (CDC) <sup>47</sup>          |
|                             | Reverse                        | TCTGGTTACTGCCAGTTGAATCTG                                    |                 |                                                                             |
|                             | Probe                          | ACCCCGCATTACGTTTGGTGGACC<br>(5'FAM/ZEN/3'Iowa Black FQ)     |                 |                                                                             |
| SARS-CoV-2;<br>N2 gene      | Forward                        | TTACAAACATTGGCCGCAAA                                        | 67              |                                                                             |
|                             | Reverse                        | GCGCGACATTCCGAAGAA                                          |                 |                                                                             |
|                             | Probe                          | ACAATTTGCCCCAGCGCTTCAG<br>(5'SUN/ZEN/3'Iowa Black FQ)       |                 |                                                                             |
| BCoV; Transmembrane gene    | Forward                        | CTGGAAGTTGGTGGAGTT                                          | 85              | Decaro et al., 2008 <sup>48</sup> .                                         |
|                             | Reverse                        | ATTATCGGCCTAACATACATC                                       |                 |                                                                             |
|                             | Probe                          | CCTTCATATCTATACACATCAAGTTGTT<br>(5'HEX/ZEN/3'Iowa Black FQ) |                 |                                                                             |
| PMMoV;<br>coat protein gene | Forward                        | GAGTGGTTTGACCTTAACGTTGA                                     | 68              | Haramoto et al., 2013 <sup>49</sup> and This study (for probe modification) |
|                             | Reverse                        | TTGTCGGTTGCAATGCAAGT                                        |                 |                                                                             |
|                             | Probe                          | CCTA+C+C+GAAGCA+A+A+TG*<br>(5'FAM/3'Iowa Black FQ)          |                 |                                                                             |

\*The Affinity Plus™ probe (IDT) with locked nucleic acids (marked as +) was used to increase the hybridization melt temperature of shorter sequences of the PMMoV probe.

Table S2: Preparation of the duplex One-Step RT-ddPCR reaction.

| Component                                                                  | Volume per reaction, $\mu\text{L}$ | Final Concentration |
|----------------------------------------------------------------------------|------------------------------------|---------------------|
| Supermix (4X)                                                              | 5.5                                | 1x                  |
| Reverse transcriptase                                                      | 2.2                                | 20 U/ $\mu\text{L}$ |
| 300 mM DTT                                                                 | 1.1                                | 15 mM               |
| 20X P/P Mix (Ch 1 dye: FAM)                                                | 1.1                                | 1x                  |
| 20X P/P Mix (Ch2 dye: Sun (a.k.a VIC) or HEX)                              | 1.1                                | 1x                  |
| Nuclease-free water                                                        | 5.5                                | -                   |
| Subtotal (Mastermix)                                                       | 16.5                               | -                   |
| RNA sample                                                                 | 5.5                                | -                   |
| Total volume* (Mastermix + sample)<br>(Volume include 10% excess in setup) | 22.0                               | -                   |

Table S3: Preparation of 20X primer/probe Mix (p/p Mix).

| Target      | Recipe              |                       |                                |                                       |
|-------------|---------------------|-----------------------|--------------------------------|---------------------------------------|
|             | Reagent             | Initial concentration | Volume added ( $\mu\text{L}$ ) | Final concentration in ddPCR reaction |
| 20X p/p Mix | Forward             | 100 $\mu\text{M}$     | 45.0                           | 900 nM                                |
|             | Reverse             | 100 $\mu\text{M}$     | 45.0                           | 900 nM                                |
|             | Probe               | 100 $\mu\text{M}$     | 12.5                           | 250 nM                                |
|             | nuclease-free water | -                     | 147.5                          | -                                     |
|             | Total volume        |                       | 250                            |                                       |



Table S4: Synthesized gene fragments used for positive controls in ddPCR.

| Target | Sequences (5' - 3')                                                                                                                                                                                                              | Reference gene GenBank ID | Ordered from |
|--------|----------------------------------------------------------------------------------------------------------------------------------------------------------------------------------------------------------------------------------|---------------------------|--------------|
| N1     | GACGTTTCGTGTTGTTTTAGATTTTCATCTA<br>AACGAACAACTAAAATGTCTGATAATGG<br>ACCCCAAATCAGCGAAATGCACCCCGCA<br>TTACGTTTGGTGGACCCTCAGATTCAACT<br>GGCAGTAACCAGAATGGAGAACGCAGTGG<br>GGCGCGATCAAAACAACGTCGGCCCAAG<br>GTTTACCCAATAATACTGCGTCTTGG  | MN975262                  | Eurofins     |
| N2     | ACGTGGTCCAGAACAACCCAAGGAAATTT<br>TGGGGACCAGGAACTAATCAGACAAGGAAC<br>TGATTACAAACATTGGCCGCAAATTGCACA<br>ATTTGCCCCAGCGCTTCAGCGTTCTTCGG<br>AATGTCGCGCATTGGCATGGAAGTCACACC<br>TTCGGGAACGTGGTTGACCTACACAGGTGC<br>CATCAAATTGGATGACAAAG   | MN975262                  | Eurofins     |
| PMMoV  | TTTTCCCGGATGTGTAATACATTAGGCGTA<br>GATCCATTGGTGGCAGCAAAGGTAATGGTA<br>GCTGTGTTTCAAATGAGAGTGGTTTGACC<br>TTAACGTTTGAGAGGCTACCGAAGCAAAT<br>GTCGCACTTGCAATTGCAACCGACAATTACA<br>TCAAAGGAGGAAGGTTTCGTTGAAGATTGTG<br>TCGTCAGACGTAGGTGAGTC | M81413                    | IDT          |
| BCoV   | GCCATTATCATGTGGATTGTGTATTTTGTG<br>AATAGTATCAGGTTGTTTATTAGAACTGGA<br>AGTTGGTGGAGTTTCAACCCAGAAACAAAC<br>AACTTGATGTGTATAGATATGAAGGGAAGG<br>ATGTATGTTAGGCCGATAATTGAGGACTAC<br>CATACCCTTACGGTCACAATAATACGTGGT<br>CATCTTTACATGCAAGGTAT | U00735                    | IDT          |

Table S5: Limit of Blank and Limit of Detection.

|    | Conc(copies/mL of Wastewater) |       |                 |
|----|-------------------------------|-------|-----------------|
|    | LoB (Rank)                    | STD   | Theoretical LOD |
| N1 | 13.605                        | 5.547 | 24.700          |
| N2 | 18.544                        | 6.712 | 31.967          |
|    | Conc(copies/20µL reaction)    |       |                 |
| N1 | 3.401                         | 1.387 | 6.175           |
| N2 | 4.636                         | 1.678 | 7.992           |

Table S6: Weekly cases for Davis between October 21, 2021 and March 31.

| Sample Date             | Cases ( $C$ ) | Tests ( $T$ ) | $r^T$ | $r^C$ | Classification |
|-------------------------|---------------|---------------|-------|-------|----------------|
| - 2021-10-24            | 29.0          | 5506.0        | -     | -     |                |
| 2021-10-24 - 2021-10-31 | 34.0          | 9922.0        | 1.80  | 1.17  | Adequate       |
| 2021-10-31 - 2021-11-07 | 25.0          | 10016.0       | 1.01  | 0.74  | Adequate       |
| 2021-11-07 - 2021-11-14 | 13.0          | 8656.0        | 0.86  | 0.52  | Adequate       |
| 2021-11-14 - 2021-11-21 | 20.0          | 9151.0        | 1.06  | 1.54  | Not adequate   |
| 2021-11-21 - 2021-11-28 | 26.0          | 5286.0        | 0.58  | 1.30  | Not adequate   |
| 2021-11-28 - 2021-12-05 | 36.0          | 9705.0        | 1.84  | 1.38  | Adequate       |
| 2021-12-05 - 2021-12-12 | 19.0          | 9388.0        | 0.97  | 0.53  | Adequate       |
| 2021-12-12 - 2021-12-19 | 50.0          | 10421.0       | 1.11  | 2.63  | Not adequate   |
| 2021-12-19 - 2021-12-26 | 129.0         | 8865.0        | 0.85  | 2.58  | Not adequate   |
| 2021-12-26 - 2022-01-02 | 450.0         | 11567.0       | 1.30  | 3.49  | Not adequate   |
| 2022-01-02 - 2022-01-09 | 993.0         | 17659.0       | 1.53  | 2.21  | Not adequate   |
| 2022-01-09 - 2022-01-16 | 588.0         | 15470.0       | 0.88  | 0.59  | Adequate       |
| 2022-01-16 - 2022-01-23 | 433.0         | 13934.0       | 0.90  | 0.74  | Adequate       |
| 2022-01-23 - 2022-01-30 | 259.0         | 12340.0       | 0.89  | 0.60  | Adequate       |
| 2022-01-30 - 2022-02-06 | 157.0         | 10510.0       | 0.85  | 0.61  | Adequate       |
| 2022-02-06 - 2022-02-13 | 103.0         | 9421.0        | 0.90  | 0.66  | Adequate       |
| 2022-02-13 - 2022-02-20 | 67.0          | 8473.0        | 0.90  | 0.65  | Adequate       |
| 2022-02-20 - 2022-02-27 | 43.0          | 7426.0        | 0.88  | 0.64  | Adequate       |
| 2022-02-27 - 2022-03-06 | 38.0          | 7203.0        | 0.97  | 0.88  | Adequate       |
| 2022-03-06 - 2022-03-13 | 29.0          | 6675.0        | 0.93  | 0.76  | Adequate       |
| 2022-03-13 - 2022-03-20 | 25.0          | 6446.0        | 0.97  | 0.86  | Adequate       |
| 2022-03-20 - 2022-03-27 | 25.0          | 2850.0        | 0.44  | 1.00  | Not adequate   |
| 2022-03-27 - 2022-04-03 | 17.0          | 3729.0        | 0.53  | 0.32  | Adequate       |
